# Supplementary material for: Separation, recovery and reuse of N-heterocyclic carbene catalysts in transesterification reactions
Source: Royal Society of Chemistry journal article supplement (doi:10.1039/b910162d), 2009-01-01

## Separation, recovery and reuse of *N*-heterocyclic carbene catalysts in transesterification reactions

Tieqiang Zeng,<sup>ba</sup> Gonghua Song<sup>\*b</sup> and Chao-Jun Li<sup>\*a</sup>

<sup>a</sup> Department of Chemistry, McGill University, 801 Sherbrooke St. West, Montreal, Quebec, Canada, H3A 2K6 Fax: (+1)-514-398-3797; phone: (+1)-514-398-8457; e-mail: [cj.li@mcgill.ca](mailto:cj.li@mcgill.ca)

<sup>b</sup> Shanghai Key Laboratory of Chemical Biology, Institute of Pesticides and Pharmaceuticals, East China University of Science and Technology, Shanghai 200237, P.R. China. Fax: +86-21-64252603; E-mail: [ghsong@ecust.edu.cn](mailto:ghsong@ecust.edu.cn)

### Supporting information

#### General information :

All catalyzed reactions were carried out under an inert atmosphere of argon by Schlenk techniques. Benzene was distilled from sodium and benzophenone under argon and stored over molecular sieves. Potassium *tert*-butoxide was stored under argon in a glovebox. All esters and alcohols purchased from Sigma-Aldrich were degassed prior to use. <sup>1</sup>H NMR and <sup>13</sup>C NMR spectra were acquired by Varian Mercury (400 and 100 MHz, respectively). Thin layer chromatography was performed by using SiliCycle Silica Gel 60 F<sub>254</sub> TLC plates. Flash column chromatography was performed over SiliCycle silica gel 40-63 μm. *N*-Heterocyclic carbenes were synthesized according to literature procedures.<sup>1</sup>

#### General procedure: The NHC-catalyzed transesterification/acylation reaction:

Under an atmosphere of argon, an oven-dried reaction vessel was charged with potassium *tert*-butoxide (11.2 mg, 0.1 mmol), IMesHCl (51.1 mg, 0.15 mmol) and benzene (5 mL). The mixture was stirred at room temperature for 1 h. Then alcohol (1 mmol) and ester (5 mmol) were added sequentially. The resulting mixture was stirred at 80 °C for 10 h. After cooling to room temperature, hydrogen chloride in diethyl ether (1 mL, 0.1 mmol, 0.1M) was added into the solution dropwise. Diethyl ether (3 mL) was added to facilitate the precipitation when necessary. IMes-HCl was filtered out, washed by ethyl ether (1 mL × 3) and dried in vacuo to get a quantitative regeneration. The filtrate was concentrated in vacuo and the residue was purified by column chromatography (SiO<sub>2</sub>, hexane/ethyl acetate 19:1) to yield the desired product.

The identity of product was confirmed by comparison with literature spectroscopic data:

**3a**<sup>2</sup>, **3c**<sup>3</sup>, **3d**<sup>4</sup>, **3e**<sup>5</sup>, **3f**<sup>6</sup>, **3g**<sup>7</sup>, **3i**<sup>2</sup>, **3j**<sup>2</sup>, **3k**<sup>8</sup>, **3l**<sup>8</sup>, **3m**<sup>9</sup>, **3n**<sup>10</sup>, **3o**<sup>4</sup>, **3p**<sup>11</sup>, **3q**<sup>12</sup>, **3r**<sup>13</sup>

#### Hexadecyl acetate (3a):

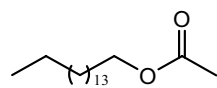

Colourless liquid. <sup>1</sup>H NMR (400MHz, CDCl<sub>3</sub>) δ 0.87 (t, *J* = 6.8 Hz, 3 H), 1.25–1.34 (m, 26 H), 1.48–1.62 (m, 2 H), 2.04 (s, 3 H), 4.04 (t, *J* = 6.8 Hz, 2 H); <sup>13</sup>C NMR (100MHz, CDCl<sub>3</sub>) δ 14.4, 21.3, 22.9, 26.2, 28.8, 29.5, 29.6, 29.8, 29.8, 29.9, 29.9, 32.2, 64.9, 171.5.

#### Tetradecyl acetate (3b):

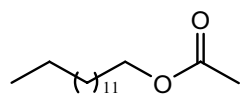

Light yellow oil.  $^1\text{H}$  NMR (400MHz,  $\text{CDCl}_3$ )  $\delta$  0.87 (t,  $J = 6.8$  Hz, 3 H), 1.25–1.34 (m, 22 H), 1.57–1.64 (m, 2 H), 2.04 (s, 3 H), 4.04 (t,  $J = 6.6$  Hz, 2 H);  $^{13}\text{C}$  NMR (100MHz,  $\text{CDCl}_3$ )  $\delta$  14.0, 20.9, 22.7, 25.9, 28.6, 29.2, 29.3, 29.5, 29.5, 29.6, 29.6, 29.7, 31.9, 64.6, 171.1; MS (EI)  $m/z$  (%) 256, 197, 196, 168, 154, 140, 125, 111, 97, 83 (100), 69, 55, 43; HRMS calcd. for  $\text{C}_{16}\text{H}_{32}\text{O}_2$   $[\text{M}]^+$ : 256.2402, found 256.2399.

**Dodecyl acetate (3c):**

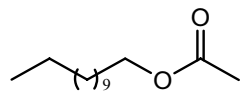

Colourless liquid.  $^1\text{H}$  NMR (400MHz,  $\text{CDCl}_3$ )  $\delta$  0.87 (t,  $J = 6.8$  Hz, 3 H), 1.25–1.34 (m, 18 H), 1.48–1.62 (m, 2 H), 2.03 (s, 3 H), 4.04 (t,  $J = 6.8$  Hz, 2 H);  $^{13}\text{C}$  NMR (100MHz,  $\text{CDCl}_3$ )  $\delta$  14.1, 21.0, 22.7, 25.9, 28.6, 29.3, 29.4, 29.5, 29.6, 29.6, 31.9, 64.7, 171.3.

**Benzyl acetate (3d):**

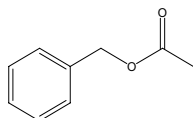

Colourless liquid.  $^1\text{H}$  NMR (400MHz,  $\text{CDCl}_3$ )  $\delta$  2.11 (s, 3H), 5.12 (s, 2H), 7.33–7.36 (m, 5H);  $^{13}\text{C}$  NMR (100MHz,  $\text{CDCl}_3$ )  $\delta$  21.3, 66.6, 128.5, 128.5, 128.7, 128.8, 136.2, 171.1.

**3-Phenylpropyl acetate (3e):**

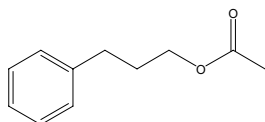

Colourless liquid.  $^1\text{H}$  NMR (400MHz,  $\text{CDCl}_3$ )  $\delta$  1.94–2.05 (m, 2H), 2.06 (s, 3H), 2.68 (t,  $J = 7.6$  Hz, 2 H), 4.10 (t,  $J = 6.8$  Hz, 2 H), 7.19–7.23 (m, 3 H), 7.28–7.32 (m, 2H);  $^{13}\text{C}$  NMR (100MHz,  $\text{CDCl}_3$ )  $\delta$  21.0, 30.2, 32.2, 63.8, 126.0, 128.4, 128.4, 141.2, 171.2.

**4-Phenylbutyl acetate (3f):**

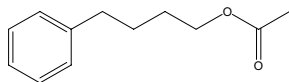

Light yellow oil.  $^1\text{H}$  NMR (400MHz,  $\text{CDCl}_3$ )  $\delta$  1.67–1.73 (m, 4H), 2.06 (s, 3H), 2.67 (t,  $J = 9.2$  Hz, 2 H), 4.11 (t,  $J = 8.4$  Hz, 2 H), 7.19–7.24 (m, 3 H), 7.28–7.34 (m, 2H);  $^{13}\text{C}$  NMR (100MHz,  $\text{CDCl}_3$ )  $\delta$  21.2, 28.0, 28.5, 35.7, 64.6, 126.1, 128.6, 128.7, 142.3, 171.4.

**4-(Methylthio)benzyl acetate (3g):**

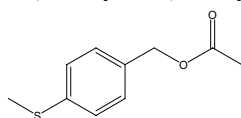

Colourless liquid.  $^1\text{H}$  NMR (400MHz,  $\text{CDCl}_3$ )  $\delta$  2.09 (s, 3H), 2.48 (s, 3H), 5.06 (s, 2 H), 7.23–7.29 (m, 4 H);  $^{13}\text{C}$  NMR (100MHz,  $\text{CDCl}_3$ )  $\delta$  15.7, 21.0, 65.9, 126.5, 129.0, 132.6, 138.8, 170.9.

**3,4-Dichlorobenzyl acetate (3h):**

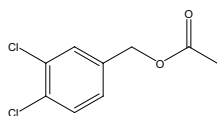

Colourless liquid.  $^1\text{H}$  NMR (400MHz,  $\text{CDCl}_3$ )  $\delta$  2.11 (s, 3H), 5.04 (s, 2 H), 7.17-7.20 (m, 1 H), 7.42-7.45 (m, 2H);  $^{13}\text{C}$  NMR (100MHz,  $\text{CDCl}_3$ )  $\delta$  20.9, 64.7, 127.4, 130.1, 130.5, 132.3, 132.7, 136.1, 170.6; MS (EI)  $m/z$  (%) 218, 176 (100), 161, 159, 141, 123, 111, 89, 75, 43; HRMS calcd. for  $\text{C}_9\text{H}_8\text{O}_2\text{Cl}_2$   $[\text{M}]^+$ : 217.9901, found 217.9907.

**4-Nitrobenzyl acetate (3i):**

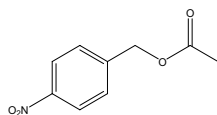

White solid.  $^1\text{H}$  NMR (400MHz,  $\text{CDCl}_3$ )  $\delta$  2.07 (s, 3H), 5.04 (s, 2 H), 7.53 (d,  $J = 8.8$  Hz, 2H), 8.22 (d,  $J = 8.8$  Hz, 2H);  $^{13}\text{C}$  NMR (100MHz,  $\text{CDCl}_3$ )  $\delta$  21.1, 65.0, 124.0, 128.6, 143.5, 147.9, 170.8.

**4-Methoxybenzyl acetate (3j):**

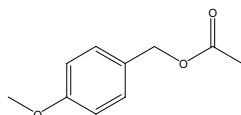

Colourless liquid.  $^1\text{H}$  NMR (400MHz,  $\text{CDCl}_3$ )  $\delta$  2.08 (s, 3H), 3.81 (s, 3H), 5.04 (s, 2H), 6.88 (d,  $J = 8.80$  Hz, 2H), 7.26 (d,  $J = 8.4$  Hz, 2H);  $^{13}\text{C}$  NMR (100MHz,  $\text{CDCl}_3$ )  $\delta$  21.1, 55.3, 66.1, 113.9, 128.0, 130.1, 159.5, 170.2.

**3,4-Dimethoxybenzyl acetate (3k):**

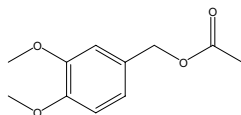

Colourless liquid.  $^1\text{H}$  NMR (400MHz,  $\text{CDCl}_3$ )  $\delta$  2.08 (s, 3H), 3.87 (s, 3H), 3.88 (s, 3H), 5.03 (s, 2H), 6.83-6.93 (m, 3H);  $^{13}\text{C}$  NMR (100MHz,  $\text{CDCl}_3$ )  $\delta$  21.3, 56.1, 66.7, 111.2, 112.1, 121.6, 128.6, 149.2, 149.4, 171.2.

**2,4-Dimethoxybenzyl acetate (3l):**

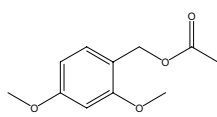

Colourless liquid.  $^1\text{H}$  NMR (400MHz,  $\text{CDCl}_3$ )  $\delta$  2.10 (s, 3H), 3.76 (s, 3H), 3.79 (s, 3H), 5.13 (s, 2H), 6.81 (d,  $J = 1.6$  Hz, 2H) 6.91 (s, 1H);  $^{13}\text{C}$  NMR (100MHz,  $\text{CDCl}_3$ )  $\delta$  21.3, 56.0, 56.3, 61.8, 111.8, 113.9, 115.9, 125.5, 151.9, 153.7, 171.2.

**Piperonyl acetate (3m):**

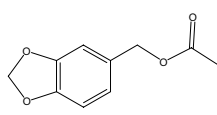

Colourless liquid.  $^1\text{H}$  NMR (400MHz,  $\text{CDCl}_3$ )  $\delta$  2.08 (s, 3H), 4.99 (s, 2H), 5.95(s, 2H), 6.77-6.84 (m, 3H);  $^{13}\text{C}$  NMR (100MHz,  $\text{CDCl}_3$ )  $\delta$  21.3, 66.5, 101.4, 108.5, 109.3, 122.5, 129.9, 147.9, 148.0, 171.1; MS (EI)  $m/z$  (%) 194, 152, 135 (100), 122, 105, 93, 77, 65, 63, 51; HRMS calcd. for  $\text{C}_{10}\text{H}_{10}\text{O}_4$   $[\text{M}]^+$ : 194.0579, found 194.0572.

**2-(Benzyloxy)ethyl acetate (3n):**

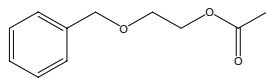

Light yellow oil.  $^1\text{H}$  NMR (400MHz,  $\text{CDCl}_3$ )  $\delta$  2.09 (s, 3H), 3.67 (m, 2H), 4.25 (m, 2H), 4.57 (s, 2H), 7.27-7.36 (m, 5H);  $^{13}\text{C}$  NMR (100MHz,  $\text{CDCl}_3$ )  $\delta$  21.0, 63.6, 67.8, 73.2, 127.8, 127.8, 128.5, 137.8, 171.1.

**Cinnamyl acetate (3o):**

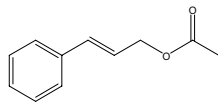

Colourless liquid.  $^1\text{H}$  NMR (400MHz,  $\text{CDCl}_3$ )  $\delta$  2.10 (s, 3H), 4.72 (d,  $J = 6.3$  Hz, 2H), 6.25-6.33 (m, 1H), 6.64 (d,  $J = 15.6$  Hz, 1H), 7.24-7.41 (m, 5H);  $^{13}\text{C}$  NMR (100MHz,  $\text{CDCl}_3$ )  $\delta$  21.3, 65.3, 123.4, 126.9, 128.3, 128.9, 134.5, 136.4, 171.1.

**Cyclohexyl acetate (3p):**

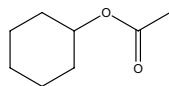

Colourless liquid.  $^1\text{H}$  NMR (400MHz,  $\text{CDCl}_3$ )  $\delta$  1.22-1.46 (m, 5H), 1.52-1.58 (m, 1H), 1.71-1.74 (m, 2H), 1.86-1.88 (m, 2H), 2.06 (s, 3H), 4.71-4.77 (m, 1H);  $^{13}\text{C}$  NMR (100MHz,  $\text{CDCl}_3$ )  $\delta$  21.4, 23.8, 25.4, 31.7, 73.0, 171.0.

**Hexadecyl Bromoethanoate (3q):**

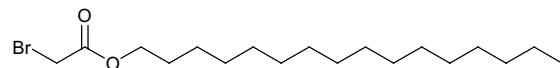

Colourless liquid.  $^1\text{H}$  NMR (400MHz,  $\text{CDCl}_3$ )  $\delta$  0.87 (t,  $J = 6.8$  Hz, 3 H), 1.25-1.37 (m, 26 H), 1.63-1.67 (m, 2 H), 3.82 (s, 2 H), 4.16 (t,  $J = 6.8$  Hz, 2 H);  $^{13}\text{C}$  NMR (100MHz,  $\text{CDCl}_3$ )  $\delta$  14.1, 22.7, 25.7, 25.9, 28.4, 29.2, 29.4, 29.5, 29.5, 29.6, 29.7, 29.7, 31.9, 66.5, 167.3.

**Benzyl 2-Bromoacetate (3r):**

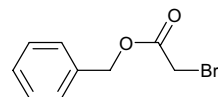

pale yellow liquid.  $^1\text{H}$  NMR (400MHz,  $\text{CDCl}_3$ )  $\delta$  3.88 (s, 2H), 5.21 (s, 2H), 7.36-7.39 (m, 5H);  $^{13}\text{C}$  NMR (100MHz,  $\text{CDCl}_3$ )  $\delta$  25.8, 67.9, 128.4, 128.6, 128.7, 135.0, 167.1.

**IMes-HO*t*Bu** in  $\text{C}_6\text{D}_6$ :  $^1\text{H}$  NMR (300MHz,  $\text{C}_6\text{D}_6$ )  $\delta$  6.73 (s, 4H, ArH), 6.33 (s, 2H, C<sub>4</sub>H), 2.07 (s, 18H, CH<sub>3</sub>), 1.03 (s, 9H, C(CH<sub>3</sub>)<sub>3</sub>)

## References

- 1 (a) A. J. Arduengo, R. Krafczyk, R. Schmutzler, H. A. Craig, J. R. Goerlich, W. J. Marshall and M. Unverzagt, *Tetrahedron*, 1999, **55**, 14523; (b) A. J. Arduengo, R. L. Harlow and M. Kline, *J. Am. Chem. Soc.*, 1991, **113**, 361; (c) J. E. Thomson, C. D. Campbell, C. Concelln, N. Duguet, K. Rix, A. M. Z. Slawin and A. D. Smith, *J. Org. Chem.*, 2008, **73**, 2784.
- 2 A. T. Khan, L. H. Choudhury and S. Ghosh, *Eur. J. Org. Chem.*, 2005, **13**, 2782.
- 3 S. Naik, V. Kavala, R. Gopinath and B. K. Patel, *ARKIVOC*, 2006, **1**, 119.
- 4 L. Zhang, Y. Luo, R. Fan and J. Wu, *Green Chem.*, 2007, **9**, 1022.
- 5 G. Bencivenni, T. Lanza, R. Leardini, M. Minozzi, D. Nanni, P. Spagnolo and G. Zanardi, *Org. Lett.*, 2008, **10**, 1127.
- 6 J. Louie, C. W. Bielawski and R. H. Grubbs, *J. Am. Chem. Soc.*, 2001, **123**, 11312.
- 7 J. M. Samanen and E. Brandeis, *J. Org. Chem.*, 1988, **53**, 561.
- 8 N. Nikolaidis and B. Ganem, *J. Org. Chem.*, 1989, **54**, 5996.
- 9 H. Hagiwara, K. Morohashi, H. Sakai, T. Suzuki and M. Ando, *Tetrahedron*, 1998, **54**, 5845.
- 10 N. Asao, H. Aikawa, S. Tago and K. Umetsu, *Org. Lett.*, 2007, **9**, 4299.
- 11 J. Nishikido, M. Kamishima, H. Matsuzawab and K. Mikami, *Tetrahedron*, 2002, **58**, 8345.
- 12 J. Haldar, P. Kondaiah and S. Bhattacharya, *J. Med. Chem.*, 2005, **48**, 3823.
- 13 J. Che, M. S. Raghavendra and Y. Lam, *J. Comb. Chem.*, 2009, **11**, 378.

STANDARD 1H OBSERVE

Data Collected on:  
m400-mercury400  
Archive directory:  
/export/home/zeng/vnmrsys/data  
Sample directory:

File: PROTON

Pulse Sequence: s2pu1  
Solvent: CDCl3

Relax. delay 1.000 sec  
Pulse 45.0 degrees  
Acq. time 1.935 sec  
Width 6419.9 Hz  
8 repetitions

OBSERVE H1, 400.1219604 MHz  
DATA PROCESSING  
FT size 32768  
Total time 0 min

tetradecyl acetate 3b

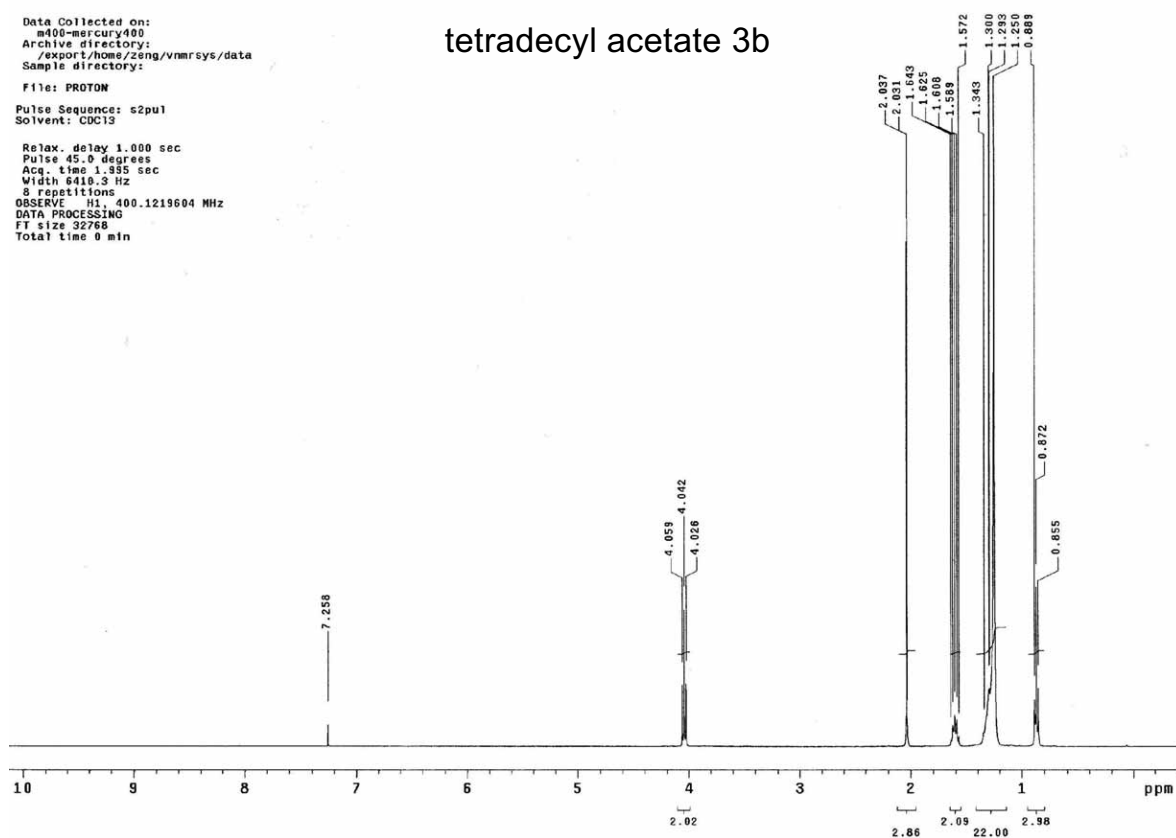

13C OBSERVE

Data Collected on:  
m400-mercury400  
Archive directory:  
/export/home/zeng/vnmrsys/data  
Sample directory:

File: CARBON

Pulse Sequence: s2pu1  
Solvent: CDCl3

Relax. delay 1.000 sec  
Pulse 45.0 degrees  
Acq. time 1.199 sec  
Width 25125.6 Hz  
358 repetitions

OBSERVE C13, 100.6107470 MHz  
DECOUPLE H1, 400.1239834 MHz  
Power 35 dB  
continuously on  
WALTZ-16 modulated  
DATA PROCESSING  
Line broadening 1.0 Hz  
FT size 85536  
Total time 1 hr, 8 min

tetradecyl acetate 3b

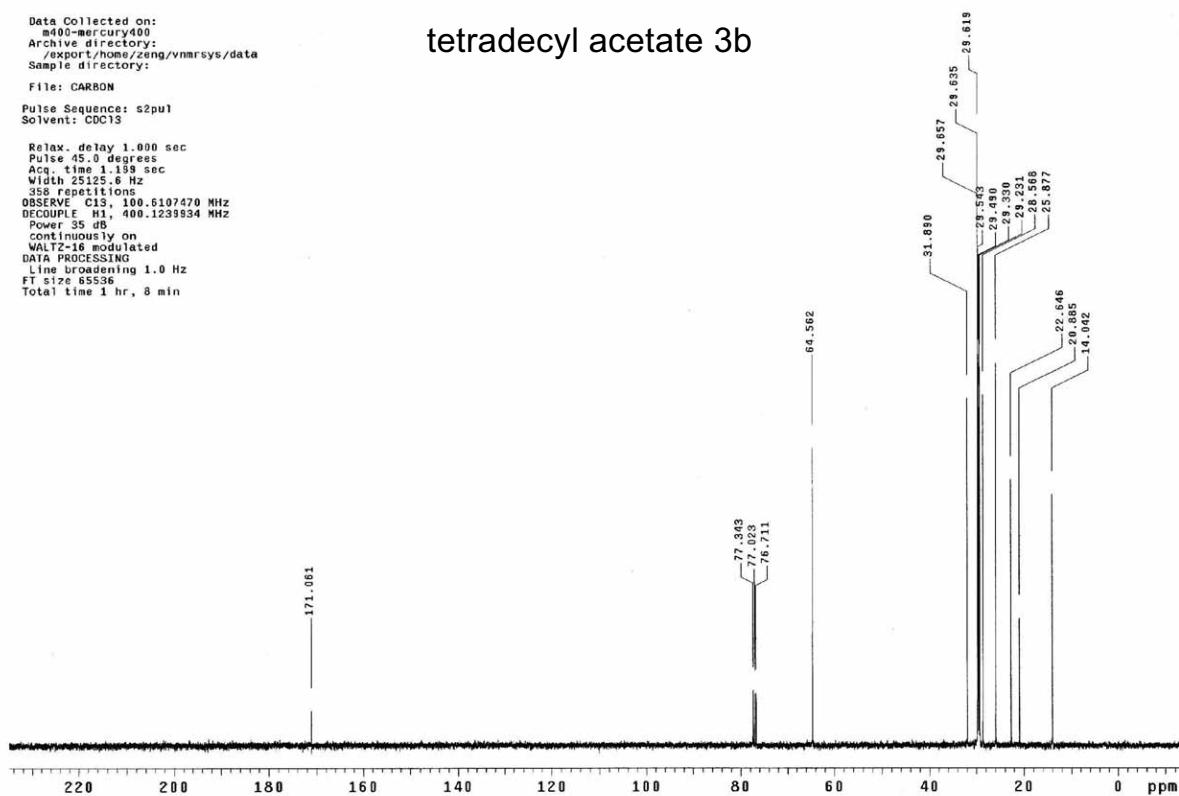

STANDARD 1H OBSERVE

Data Collected on:  
m400-mercury400  
Archive directory:  
/export/home/zeng/vnmrsys/data  
Sample directory:

File: PROTON  
Pulse Sequence: s2pu1  
Solvent: CDCl3

Relax. delay 1.000 sec  
Pulse 45.0 degrees  
Acq. time 1.935 sec  
Width 6410.3 Hz  
8 repetitions  
OBSERVE H1, 400.1219604 MHz  
DATA PROCESSING  
FT size 32768  
Total time 0 min

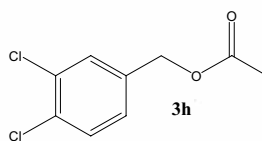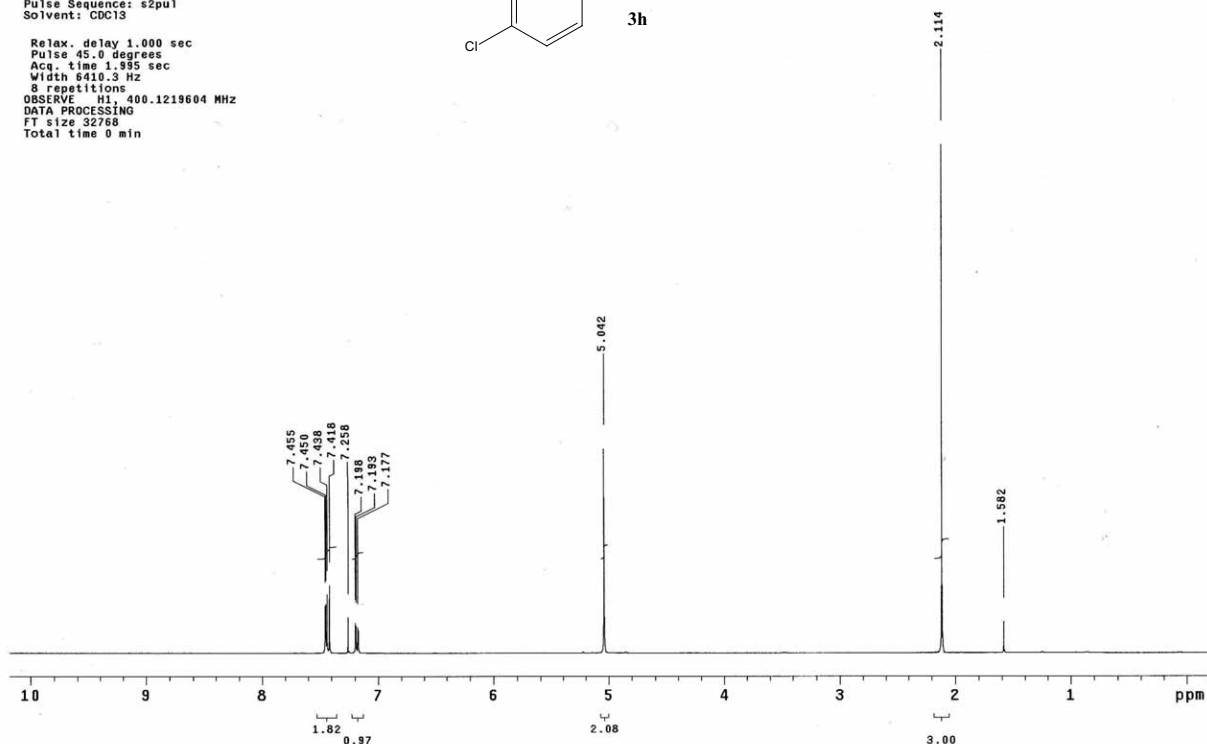

13C OBSERVE

Data Collected on:  
m400-mercury400  
Archive directory:  
/export/home/zeng/vnmrsys/data  
Sample directory:

File: CARBON  
Pulse Sequence: s2pu1  
Solvent: CDCl3

Relax. delay 1.000 sec  
Pulse 45.0 degrees  
Acq. time 1.138 sec  
Width 25125.6 Hz  
1000 repetitions  
OBSERVE C13, 100.6107470 MHz  
DECOUPLE H1, 400.1239934 MHz  
Power 35 dB  
continuously on  
WALTZ-16 modulated  
DATA PROCESSING  
Line broadening 1.0 Hz  
FT size 65536  
Total time 1 hr, 8 min

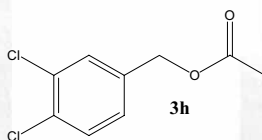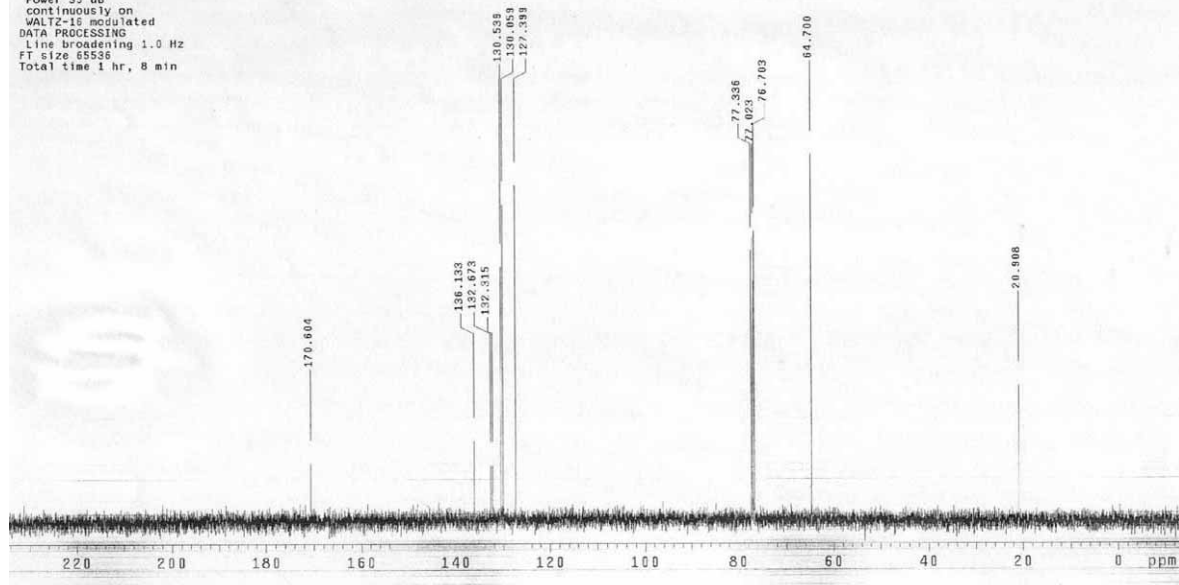

STANDARD 1H OBSERVE

Data Collected on:  
m400-mercury400  
Archive directory:  
/export/home/zeng/vnmrsys/data  
Sample directory:

File: PROTON

Pulse Sequence: s2pu1  
Solvent: CDCl3

Relax. delay 1.000 sec  
Pulse 45.0 degrees  
Acq. time 1.995 sec  
Width 6410.3 Hz  
32 repetitions

OBSERVE H1, 400.1219604 MHz  
DATA PROCESSING  
FT size 32766  
Total time 1 min

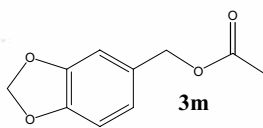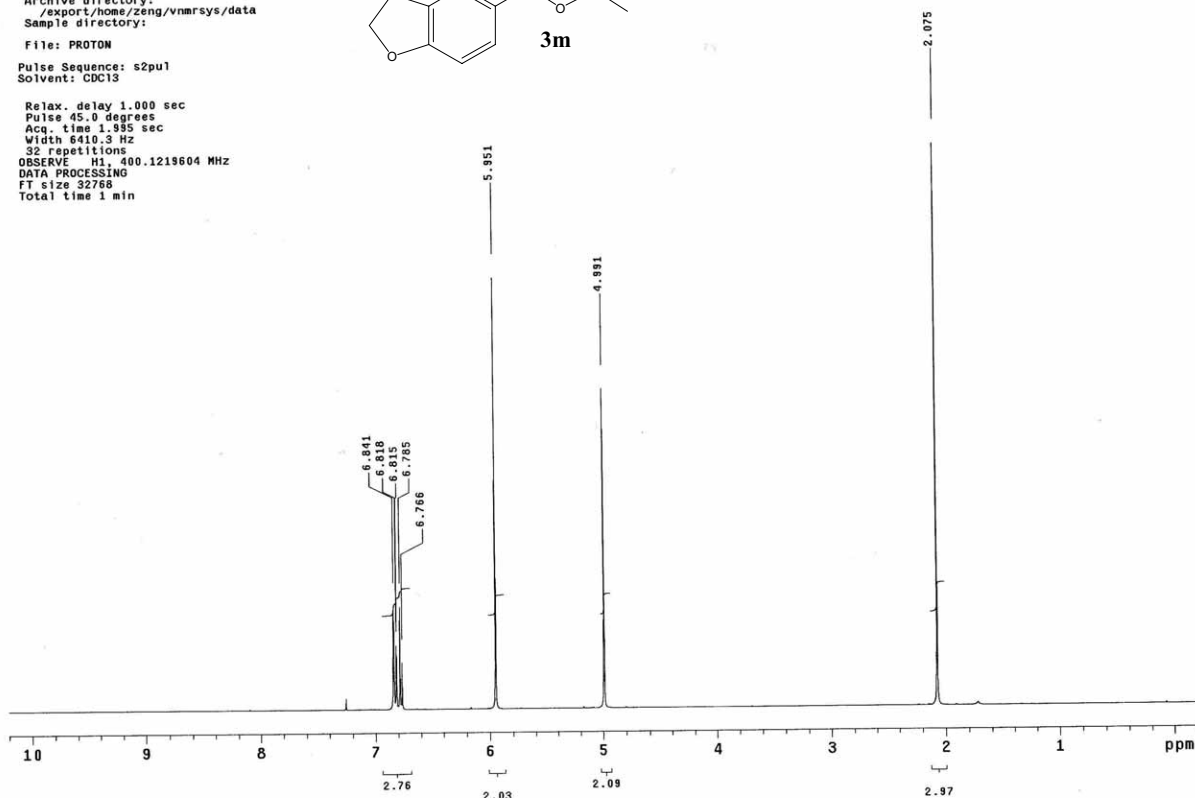

13C OBSERVE

Pulse Sequence: s2pu1  
Solvent: CDCl3  
Ambient temperature  
Mercury-300 "m300"

Relax. delay 1.500 sec  
Pulse 42.4 degrees  
Acq. time 1.815 sec  
Width 18761.7 Hz  
366 repetitions

OBSERVE C13, 75.4488692 MHz  
DECOUPLE H1, 300.0564325 MHz  
Power 55 dB  
continuously on  
WALTZ-16 modulated  
DATA PROCESSING  
Line broadening 1.0 Hz  
FT size 131072  
Total time 15 hr, 12 min, 38 sec

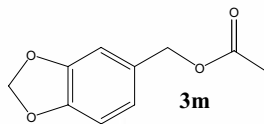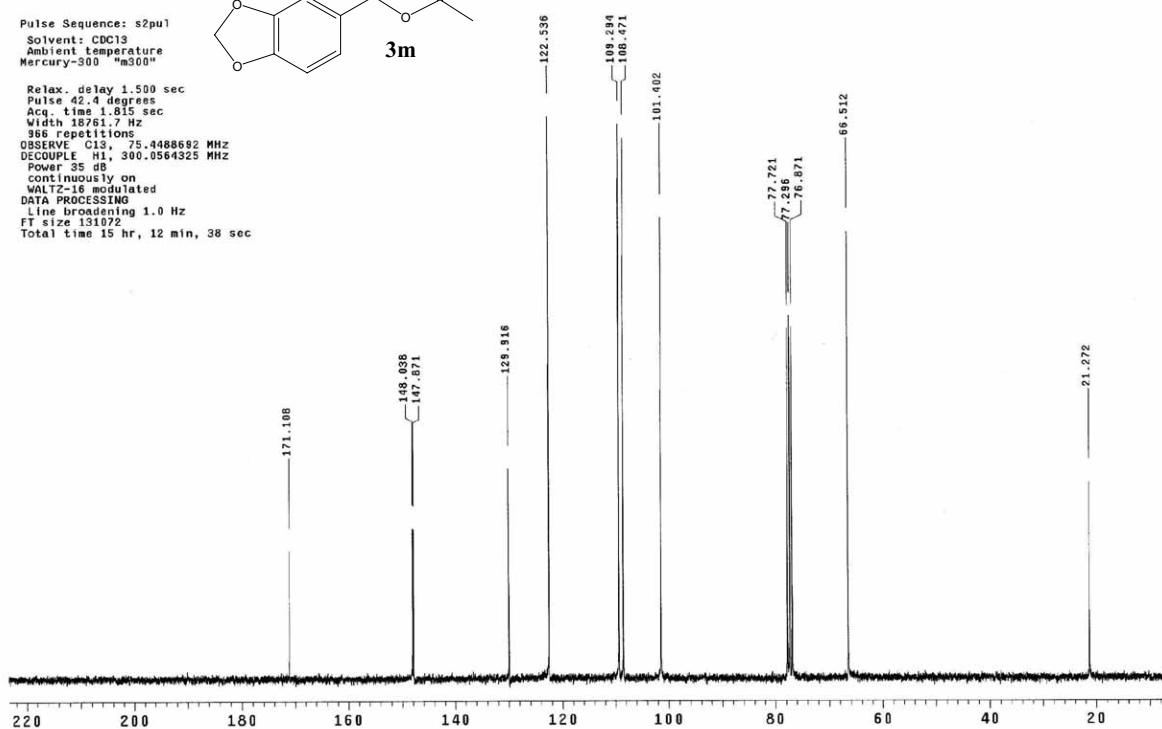

Supplement: b910162d.pdf [file b910162d.pdf]
